# Supplementary material for: Childhood Obesity, Other Cardiovascular Risk Factors, and Premature Death
Source: Atypon-hosted journal article supplement (doi:10.1056/nejmoa0904130), 2010-02-10
Supplement: nejm_franks_485sa1.pdf [file nejm_franks_485sa1.pdf]

## Supplementary Appendix

This appendix has been provided by the authors to give readers additional information about their work.

Supplement to: Franks PW, Hanson RL, Knowler WC, Sievers ML, Bennett PH, Looker HC. Childhood obesity, other cardiovascular risk factors, and premature death. *N Engl J Med* 2010;362:485-93.

## Supplementary file

### Online appendix 1: Specific Causes of Death and Corresponding International Classification of Disease (ICD)-9 codes Used in This Study

| ICD-9 cause(s) of death                                                                                                   | ICD-9 codes                                                                                                                                                                                                 |
|---------------------------------------------------------------------------------------------------------------------------|-------------------------------------------------------------------------------------------------------------------------------------------------------------------------------------------------------------|
| <i>Infections</i>                                                                                                         | 001.0 through 139.8;<br>320.0 through 326.9;<br>460.0 through 466.1;<br>480.0 through 487.8;<br>540.0 through 543.9;<br>572.0;<br>590.0 through 590.9;<br>599.0;<br>680.0 through 686.9;<br>729.4;<br>730.0 |
| <i>Malignancy</i>                                                                                                         | 140.0 through 208.9; 236.1                                                                                                                                                                                  |
| <i>Diabetes/diabetes nephropathy</i>                                                                                      | 250.0 through 250.9                                                                                                                                                                                         |
| <i>Alcohol/Drug</i>                                                                                                       | 303.0; 303.9; 291.0; 304.0                                                                                                                                                                                  |
| <i>Cardiovascular Disease</i>                                                                                             | 390.0 through 459.9                                                                                                                                                                                         |
| <i>Alcohol Liver</i>                                                                                                      | 571.0 through 571.3                                                                                                                                                                                         |
| <i>External</i>                                                                                                           | 800.0 through 999.9                                                                                                                                                                                         |
| Deaths which were not coded by any of the above ICD-9 codes were classified as 'Other' (ICD-9 codes: 000.0 through 799.9) |                                                                                                                                                                                                             |
